# Supplementary material for: Binary and ternary cocrystals of sulfa drug acetazolamide with pyridine carboxamides and cyclic amides
Source: PubMed Central journal article supplement (PMC4775163; doi:10.1107/s2052252516000543), 2016-02-25
Supplement: m-03-00152-sup11.pdf [file m-03-00152-sup11.pdf]

# IUCrJ

**Volume 3 (2016)**

**Supporting information for article:**

**Binary and ternary cocrystals of sulfa drug acetazolamide with pyridine carboxamides and cyclic amides**

**Geetha Bolla and Ashwini Nangia**

**Table S1** Hydrogen bond geometry of the crystal structures (neutron normalized) in this paper.

| Cocystal                | Interaction   | H...A /Å | D...A /Å | ∠D-H...A /° | Symmetry code     |
|-------------------------|---------------|----------|----------|-------------|-------------------|
| ACZ-VLM (1:2)           | N3-H3A...O4   | 1.93     | 2.789(2) | 174         | 1+x,1/2-y,-1/2+z  |
|                         | N4-H4A...O5   | 2.03     | 2.881(3) | 170         | 1+x,y,z           |
|                         | N4-H4B...O4   | 2.21     | 2.920(3) | 159         | 1+x,y,z           |
|                         | N5-H5A...O5   | 2.03     | 2.873(2) | 166         | x,-y,1-z          |
|                         | N6-H6C...N1   | 2.15     | 2.999(3) | 167         | -1+x,y,z          |
| ACZ-CPR hydrate (1:1:1) | N3-H3A...N2   | 2.13     | 2.937(2) | 176         | -x,1-y,-z         |
|                         | N4-H4D...O4   | 1.9      | 2.810(2) | 176         | 1-x,-y,1-z        |
|                         | N4-H4E...O5   | 1.96     | 2.844(3) | 164         | x,-1+y,z          |
|                         | N5-H5A...O4   | 2.13     | 2.931(3) | 176         | 1-x,1-y,-z        |
|                         | O5-H5B...O2   | 2.26     | 3.020(3) | 155         | -1+x,1+y,z        |
|                         | O5-H5B...O2   | 2.59     | 3.125(3) | 124         | 1-x,1-y,-z        |
|                         | O5-H5C...N1   | 2.41     | 3.123(3) | 167         | 1-x,1-y,-z        |
|                         | C4-H4B...O2   | 2.58     | 3.516(3) | 165         | 1-x,1-y,-z        |
|                         | C10-H10B...O3 | 2.51     | 3.471(3) | 172         | ---- <sup>a</sup> |
| ACZ-2HP (1:2)           | N3-H3A...O5   | 1.85     | 2.705(3) | 173         | 1-x,1-y,-z        |
|                         | N4-H4A...O4   | 2.01     | 2.834(3) | 172         | 2-x,1-y,1-z       |
|                         | N4-H4B...O1   | 2.09     | 2.967(3) | 172         | 2-x,2-y,-z        |
|                         | N5-H5A...O4   | 1.98     | 2.822(3) | 166         | 2-x,1-y,1-z       |
|                         | N6-H6A...N2   | 2.10     | 2.954(3) | 169         | 1-x,1-y,-z        |
|                         | C6-H6...O3    | 2.51     | 3.143(4) | 126         | 1-x,1-y,1-z       |
|                         | C12-H12...O1  | 2.58     | 3.479(3) | 162         | 1-x,2-y,-z        |
|                         | C13-H13...O2  | 2.58     | 3.471(4) | 160         | 1-x,2-y,-z        |
| ACZ-2HP (1:1)           | N3-H3A...O4   | 1.86     | 2.744(2) | 177         | 1+x,y,1+z         |
|                         | N4-H4D...N1   | 2.152    | 2.973(2) | 163         | -1+x,y,z          |
|                         | N4-H4E...O3   | 2.056    | 2.893(2) | 167         | 1/2+x,1/2-y,1/2+z |
|                         | N5-H5A...N2   | 2.21     | 2.966(3) | 171         | -1+x,y,-1+z       |
|                         | C4-H4B...O1   | 2.58     | 3.528(3) | 170         | -x,-y,1-z         |
| ACZ-MeHP (1:1)          | N4-H4D...N5   | 2.368    | 2.368(4) | 147         | ---- <sup>a</sup> |
|                         | N4-H4E...O12  | 2.133    | 2.966(5) | 178         | x,-y+1,+z-1/2     |
|                         | N8-H6A...O3   | 2.244    | 3.141(1) | 150         | x,-y+1,+z-1/2     |

|                              |              |          |          |          |                |
|------------------------------|--------------|----------|----------|----------|----------------|
|                              | N8–H6B…O5    | 1.861    | 2.939(1) | 175      | x,-y+1,+z-1/2  |
|                              | N7–H41…O10   | 1.816    | 2.674(2) | 175      | x,-y+1,+z-1/2  |
|                              | N8–H6B…O7    | 2.257    | 2.995(3) | 157      | x,+y,+z-1      |
|                              | N11–H11A…O12 | 1.881    | 2.740(2) | 178      | x-1,+y,+z      |
|                              | N12–H12E…O9  | 2.708    | 2.965(1) | 103      | x,-y,+z+1/2    |
|                              | N12–H12E…O4  | 2.311    | 2.986(2) | 156      | x,+y,+z+1      |
|                              | N13–H13A…N6  | 2.143    | 2.995(2) | 170      | x,-y+1,+z+1/2  |
|                              | N3–H53A…O11  | 1.964    | 2.771(2) | 170      | x+1,+y,+z      |
| ACZ–OMeHP<br>hydrate (1:1:1) | N3–H3A…O5    | 2.00     | 2.795(3) | 174      | 2-x,-y,-z      |
|                              | N4–H4D…O6    | 2.05     | 2.844(3) | 168      | 1-x,-y,1-z     |
|                              | N4–H4E…O4    | 2.23     | 3.047(3) | 150      | ----           |
|                              | N5–H5A…N2    | 2.03     | 2.959(3) | 176      | 2-x,-y,-z      |
|                              | O6–H6A…O5    | 1.95     | 2.846(3) | 167      | ----           |
|                              | O6–H6B…N1    | 2.34     | 3.006(4) | 149      | -1+x,y,z       |
|                              | C4–H4A…O2    | 2.49     | 3.404(4) | 160      | x,y,-1+z       |
|                              | C7–H7…O1     | 2.50     | 3.426(3) | 177      | 1-x,1-y,-z     |
| ACZ–NAM<br>(1:1)             | N3–H3A…N2    | 2.02     | 2.873(5) | 175      | -x,-y,1-z      |
|                              | N4–H4D…N5    | 2.13     | 2.915(6) | 165      | x,-1+y,z       |
|                              | N4–H4E…O4    | 2.11     | 2.893(5) | 165      | 2-x,1-y,-z     |
|                              | N6–H6A…O4    | 2.06     | 2.916(5) | 174      | 3-x,1-y,-z     |
|                              | N6–H6B…O2    | 2.31     | 3.089(5) | 151      | ----           |
|                              | C6–H6…O4     | 2.48     | 2.805(6) | 101      | Intramolecular |
|                              |              | C7vH7…O3 | 2.55     | 3.438(6) | 160            |
|                              | C8–H8…O1     | 2.55     | 3.469(7) | 168      | ----           |
| ACZ–NAM–<br>2HP (1:1:1)      | N3–H3A…N5    | 2.05     | 2.904(3) | 176      | 1-x,1-y,1-z    |
|                              | N4–H4D…O5    | 1.89     | 2.810(3) | 168      | 2-x,-y,1-z     |
|                              | N4–H4E…O4    | 2.14     | 2.954(3) | 173      | 2-x,1-y,-z     |
|                              | N6–H6B…O1    | 1.98     | 2.840(3) | 174      | -----          |
|                              | N7–H7A…O1    | 1.93     | 2.785(3) | 174      | 1+x,-1+y,z     |
|                              | C7–H7…N1     | 2.61     | 3.238(4) | 126      | -----          |
|                              | C8–H8…N2     | 2.62     | 3.446(4) | 149      | -----          |
|                              | C9–H9…N2     | 2.61     | 3.400(4) | 143      | 1-x,1-y,1-z    |
|                              | C15–H15…O5   | 2.52     | 3.359(4) | 151      | 1-x,-y,1-z     |

**Table S2** REFCODEs of sulfonamide–amide, sulfonamide–pyridine and sulfonamide–acid supramolecular synthons in the CSD.

| Sulfonamide–amide (25)   |          |        |        |                       |
|--------------------------|----------|--------|--------|-----------------------|
| DATFEL                   | DATFIP   | EGENIP | LIQQEJ | LIQQIN                |
| LIQQIN01                 | LIQQIN02 | LOFLID | NUMGUZ | NUMHAG                |
| NUMHEK                   | NUMHIO   | NUMHOU | NUMHUA | NUMJAI                |
| NUMJEM                   | NUMJIQ   | NUMJOW | NUMJUC | NUMKAJ                |
| NUMKEN                   | PIRYAS   | SANAPY | XAVTEV | YASGOQ02 <sup>a</sup> |
| YASGOQ04 <sup>a</sup>    |          |        |        |                       |
| Sulfonamide–pyridine (4) |          |        |        |                       |
| EGEPAJ                   | POVGAK   | POVGEO | POVGIS |                       |
| Sulfonamide–acid (3)     |          |        |        |                       |
| ACIFAT                   | BOKHAM   | LOFLAV |        |                       |

<sup>a</sup> The same Refcode is repeated twice.
